# Supplementary material
Source: PubMed Central journal article supplement (PMC3679520)
Supplement: NIHMS53285-supplement-suppl_fig_20.pdf [file NIHMS53285-supplement-suppl_fig_20.pdf]

# Supplementary Figure 20

a

|                            | Mouse (n=3)      | Rat (n = 3)    | Dog (n=3)           |
|----------------------------|------------------|----------------|---------------------|
| IV dose (mg/kg)            | 3                | 1              | 1                   |
| CLb (mL/min/kg)            | 8 ± 1            | 18 ± 5         | 38 ± 10             |
| Vss (L/kg)                 | 1.2 ± 0.1        | 2.1 ± 0.1      | 3.0 ± 0.6           |
| t <sub>1/2</sub> (h)       | 1.8 ± 0.3        | 1.7 ± 0.3      | 1.2 ± 0.1           |
| MRT (h)                    | 2.5 ± 0.2        | 2.1 ± 0.5      | 1.3 ± 0.1           |
| AUC <sub>last</sub> (uM/h) | 15.0 ± 1.5       | 2.3 ± 0.5      | 1.1 ± 0.3           |
| AUC <sub>∞</sub> (uM/h)    | 15.3 ± 2.3       | 2.4 ± 0.6      | 1.2 ± 0.3           |
| Oral dose (mg/kg)          | 3                | 2              | 3                   |
| C <sub>max</sub> (uM)      | 3.87 ± 1.03      | 0.72 ± 0.24    | 0.09 ± <0.1         |
| T <sub>max</sub> (h)       | 1.02 (1.0 – 1.5) | 0.75 (0.5 – 1) | 2 (0.7 – 3.9)       |
| t <sub>1/2</sub> (h)       | 2.6 ± 0.3        | 2.1 ± 0.3      | 4.7 and 2.2 (n = 2) |
| AUC <sub>last</sub> (uM/h) | 18.2 ± 4.9       | 2.8 ± 1.1      | 0.5 ± 0.2           |
| AUC <sub>∞</sub> (uM/h)    | 19.1 ± 4.8       | 2.9 ± 1.2      | 0.8, 0.3 (n=2)      |
| F (%)                      | ca. 100%         | 66 ± 26        | 16 ± 3              |

(based on AUC<sub>last</sub> data)

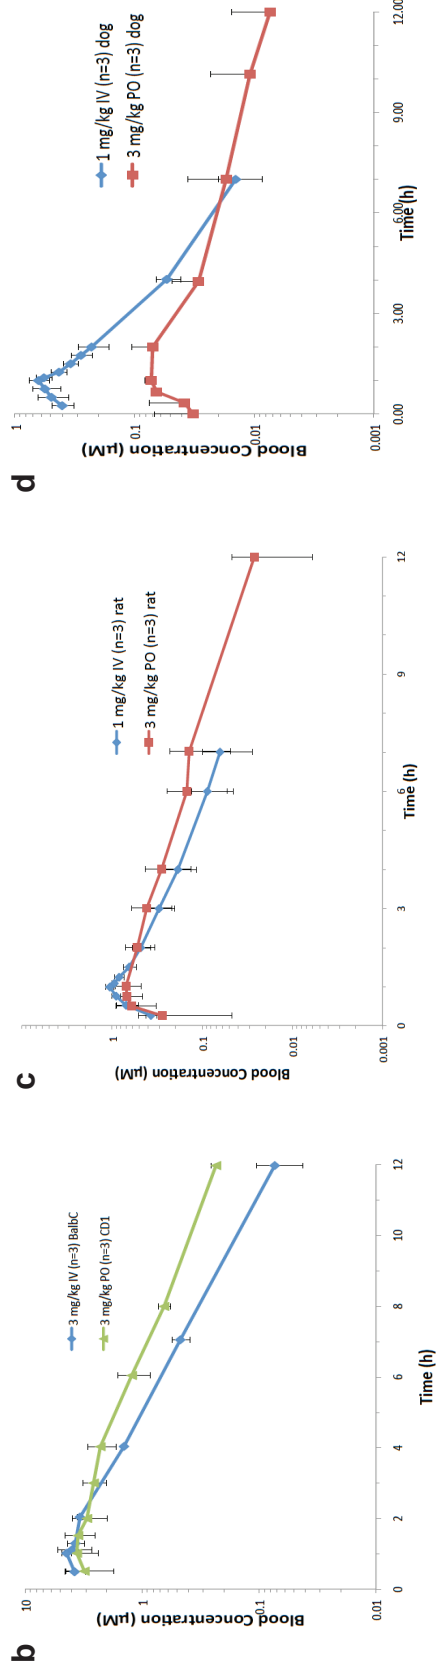

**Supplementary Figure 20: (a)** The preclinical pharmacokinetics of I-BET151 determined in mouse, rat and dog. All intravenous doses were infused over 1h. For mouse studies male Balb/C mice were used for the intravenous experiments and male CD1 mice were used for the oral experiments. Male Sprague Dawley rats and male beagle dogs were used in a crossover manner with an appropriate washout period between doses (3 days for rat, 7 days for dog). For intravenous doses I-BET151 was dissolved in normal saline containing 2% (v/v) DMSO and 10% (w/v) Kletopse HPB. For oral dose I-BET151 was suspended in 1%(w/v) methylcellulose (CP400). Serial blood samples were taken and analysed as described previously. Pharmacokinetic data analysis was performed using non-compartmental analysis and WinNonlin Phoenix v6.1 software. Mean ± SD data (except T<sub>max</sub> [mean and range]) are shown below. Calculated pharmacokinetic parameters show low clearance (CLb) with high oral bioavailability (F<sub>po</sub>) in mouse and rat, with higher clearance and lower oral bioavailability in the dog. Volume of distribution at steady state (V<sub>ss</sub>) varied from 1 to 3 L/kg indicative of tissue distribution. Terminal half-lives (t<sub>1/2</sub>) were between 1.2 and 1.8 h with corresponding mean residence times (MRT) of 1.3 to 2.5 h. C<sub>max</sub> is the maximum blood concentration determined at time T<sub>max</sub>. AUC<sub>last</sub> and AUC<sub>∞</sub> are the area's under the curve to the last data point and extrapolated to infinity, respectively. Data are expressed graphically as follows: (b) Mean ± SD (n = 3) blood concentration-time profiles of I-BET151 after intravenous (1 h infusion) and oral administration to the mouse. (c) Mean ± SD (n = 3) blood concentration-time profiles of I-BET151 after intravenous (1 h infusion) and oral administration to the rat. (d) Mean ± SD (n = 3) blood concentration-time profiles of I-BET151 after intravenous (1 h infusion) and oral administration to the dog.
